# Supplementary material for: The CD4−CD8− MAIT cell subpopulation is a functionally distinct subset developmentally related to the main CD8+ MAIT cell pool
Source: PubMed Central journal article supplement — Proc Natl Acad Sci U S A. 2018 Nov 15;115(49):E11513–22. doi: 10.1073/pnas.1812273115 (PMC6298106; doi:10.1073/pnas.1812273115), 2018-11-15
Supplement: pnas.1812273115.sapp.pdf [file pnas.1812273115.sapp.pdf]

## Supplementary Information for

### **The CD4<sup>-</sup>CD8<sup>-</sup> MAIT cell subpopulation is a functionally distinct subset developmentally related to the main CD8<sup>+</sup> MAIT cell pool**

Joana Dias, Caroline Boulouis, Jean-Baptiste Gorin, Robin H. G. A. van den Biggelaar, Kerri G. Lal, Anna Gibbs, Liyen Loh, Muhammad Yaaseen Gulam, Wan Rong Sia, Sudipto Bari, William Y. K. Hwang, Douglas F. Nixon, Son Nguyen, Michael R. Betts, Marcus Buggert, Michael A. Eller, Kristina Broliden, Annelie Tjernlund, Johan K. Sandberg, and Edwin Leeansyah

Corresponding author: Edwin Leeansyah  
Email: [edwin.leeansyah@ki.se](mailto:edwin.leeansyah@ki.se)

#### **This PDF file includes:**

Figs. S1 to S6  
Tables S1 to S4

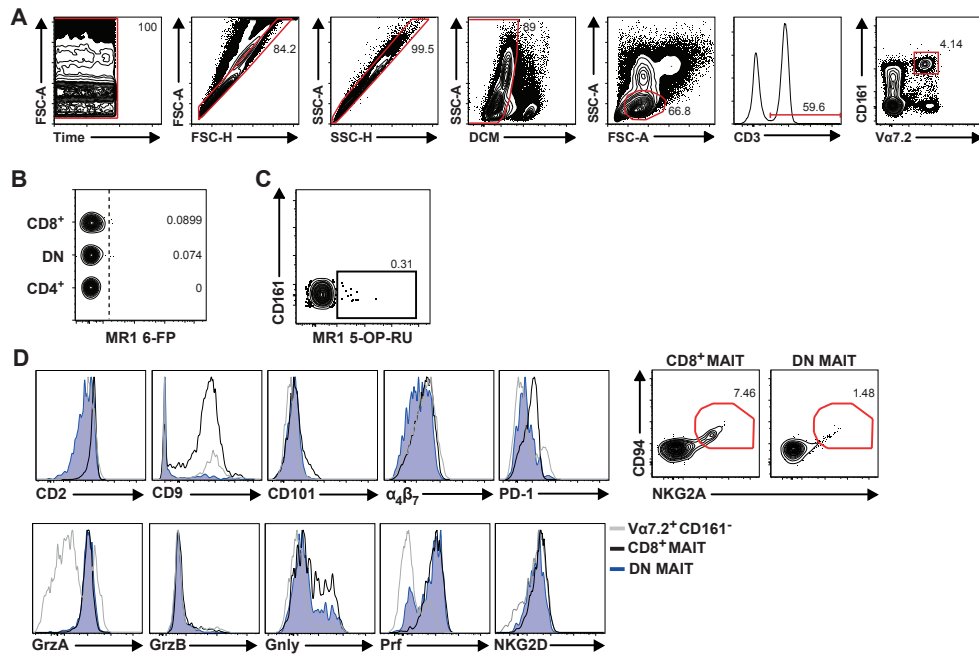

**Fig. S1.** Flow cytometry identification of MAIT cells. (A) Representative example of the gating strategy to identify  $CD161^{hi}Va7.2^{+}$  MAIT cells. (B) Representative example of the MR1 6-FP tetramer staining in  $CD8^{+}$ , DN, and  $CD4^{+}$   $CD161^{hi}Va7.2^{+}$  MAIT cells. Data are representative from 10 donors. (C) Representative FACS plot of MR1 5-OP-RU tetramer staining on  $CD161^{+}Va7.2^{+}$  non-MAIT cells. (D) Representative FACS plot of the expression of CD2, CD9, CD101,  $\alpha_4\beta_7$ , PD-1, CD94, NKG2A, NKG2D, GrzA, GrzB, Gnly, and Prf on  $CD8^{+}$  and DN MAIT cells.  $CD161^{+}Va7.2^{+}$  non-MAIT T cells were used as controls. Grz; Granzyme, Gnly; granulysin, Prf, perforin.

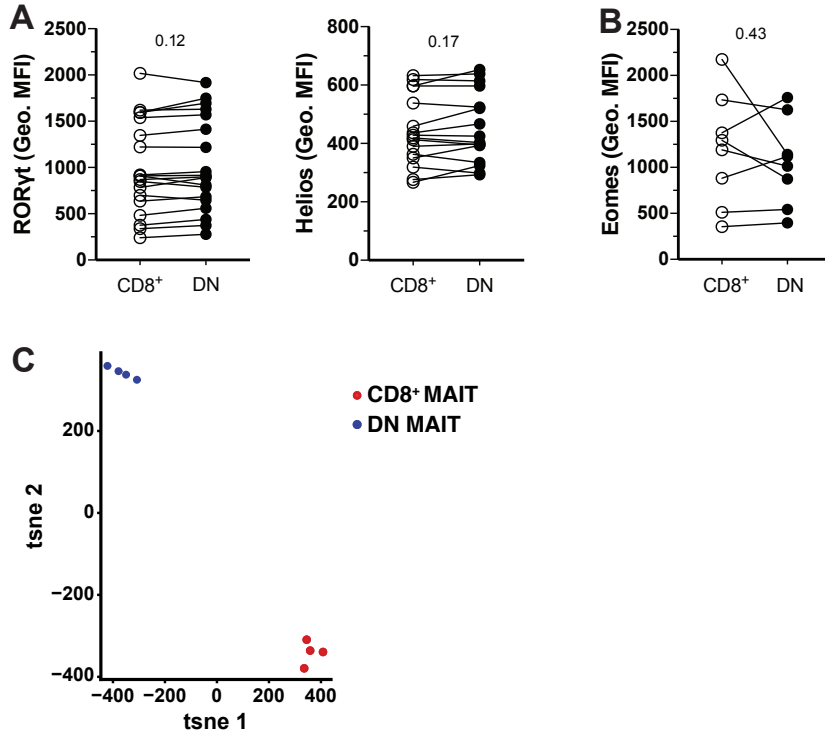

**Fig. S2.** T cell transcription factor expression. The expression of (A) ROR $\gamma$ t and Helios on CD8<sup>+</sup> and DN MAIT cells from peripheral blood, and (B) Eomes on CD8<sup>+</sup> and DN MAIT cells from the endometrium. (C) t-SNE analysis of CD8<sup>+</sup> and DN MAIT cells based on their transcriptional profiles. Data are from 16-19 (A) and 8 (B) donors. Lines in the graphs represent individual donors. The paired *t*-test was performed to detect significant differences between paired samples.

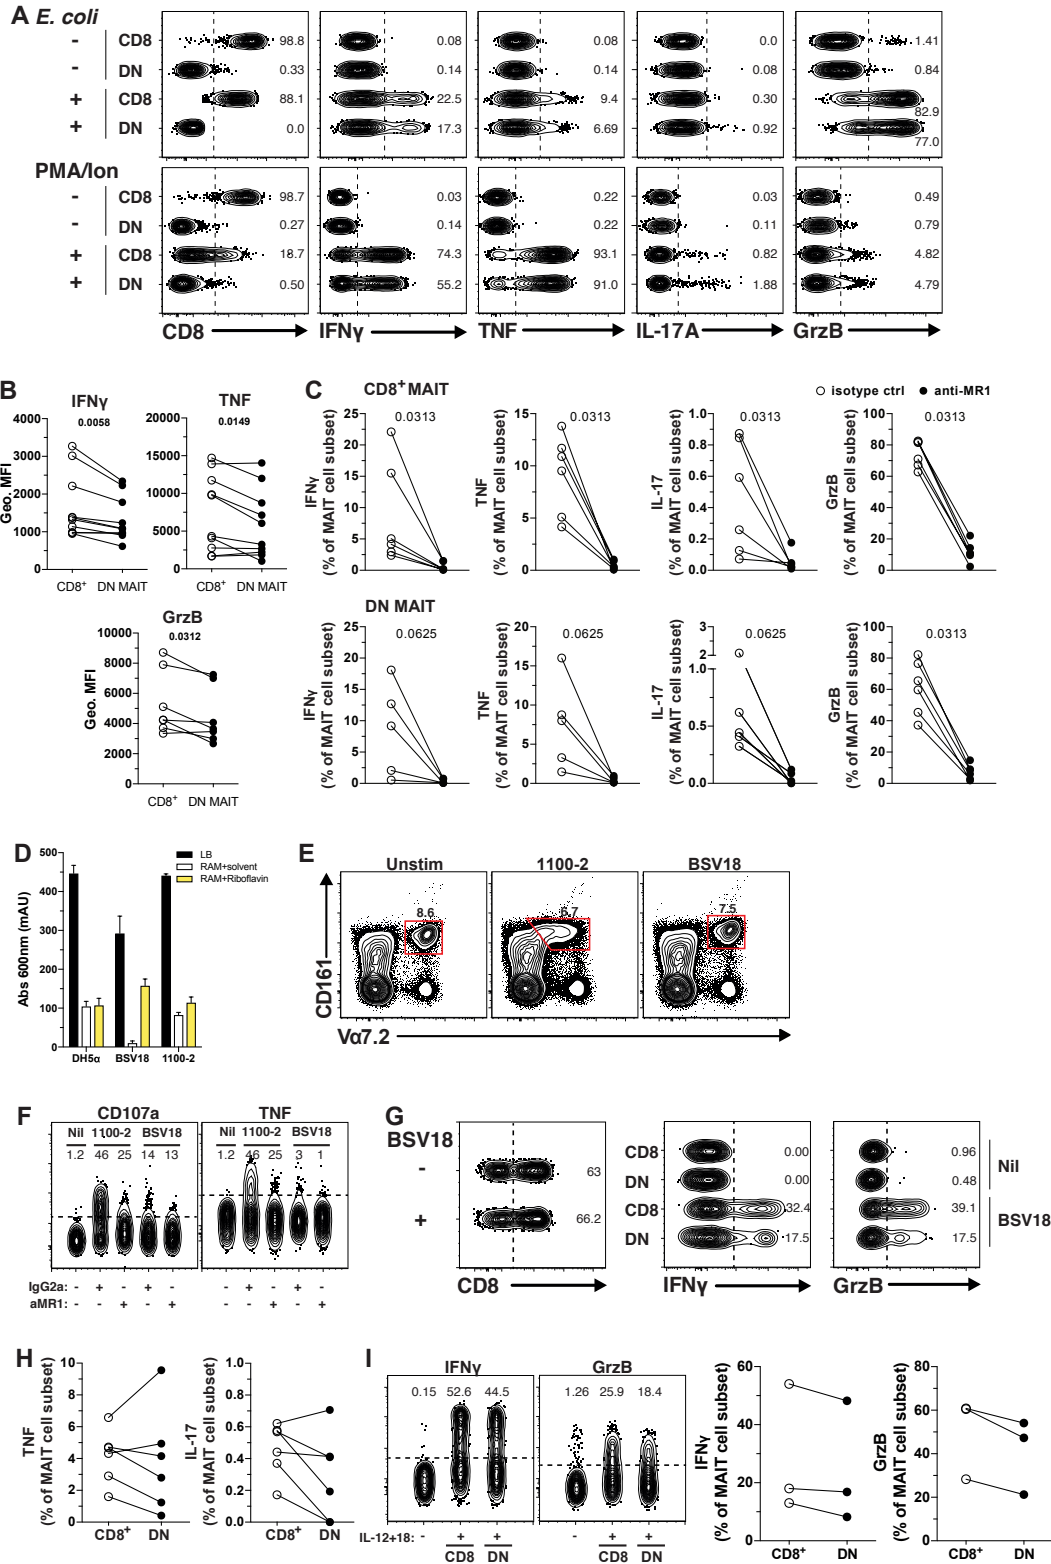

**Fig. S3.** Expression of CD8, cytokines and cytolytic molecules after MAIT cell stimulation. (A) Representative example of the expression of CD8, IFN $\gamma$ , TNF, IL-17, and GrzB in FACS-sorted CD8<sup>+</sup> and DN MAIT cell populations stimulated with *E. coli* for 24 h (n=7) or PMA/ionomycin for 6 h (n=10). (B) Geometric mean fluorescence intensity (Geo. MFI) of IFN $\gamma$ , TNF, and GrzB staining in FACS-sorted CD8<sup>+</sup> and DN MAIT cells positive for these molecules (IFN $\gamma$ , TNF after PMA/ionomycin and GrzB after *E. coli* stimulation) (C) Percentages of FACS-sorted CD8<sup>+</sup> and DN MAIT cells expressing IFN $\gamma$ , TNF, IL-17, and GrzB after *E. coli* stimulation and in the presence of MR1-blocking mAb or isotype ctrl. Data are from 7 (A), 7 to 10 (B), and 5 to 6 (C) donors. Lines represent individual donors. The Wilcoxon's signed-rank test was performed to detect significance. (D) The growth of *E. coli* strains DH5 $\alpha$ , riboflavin-auxotroph BSV18, and its congenic riboflavin-autotroph 1100-2 in lysogeny broth (LB), riboflavin assay medium (RAM) with and without riboflavin supplementation. Growth was determined by turbidity measurement at 600 nm. Data are from at least 3 independent experiments. Bar graphs and error bars represent mean and SD. (E) The expression of V $\alpha$ 7.2 and CD161 on MAIT cells following stimulation with *E. coli* strains 1100-2 and BSV18. Representative FACS plots from 9 independent donors are shown. (F) MAIT cell degranulation (CD107a) and TNF production following stimulation with *E. coli* strains 1100-2 and BSV18 in the presence of isotype control (IgG2a) or anti-MR1. (G) CD8 expression on MAIT cells following stimulation with *E. coli* BSV18. Representative FACS plots from 6-9 individual donors are shown. (H) TNF and IL-17 production following stimulation with *E. coli* BSV18. Data are from at least 5 independent donors represented by individual lines. (I) IFN $\gamma$  and GrzB expression by CD8<sup>+</sup> and DN MAIT cells following IL-12 and IL-18 stimulation. Data are from 3 independent donors represented by individual lines.

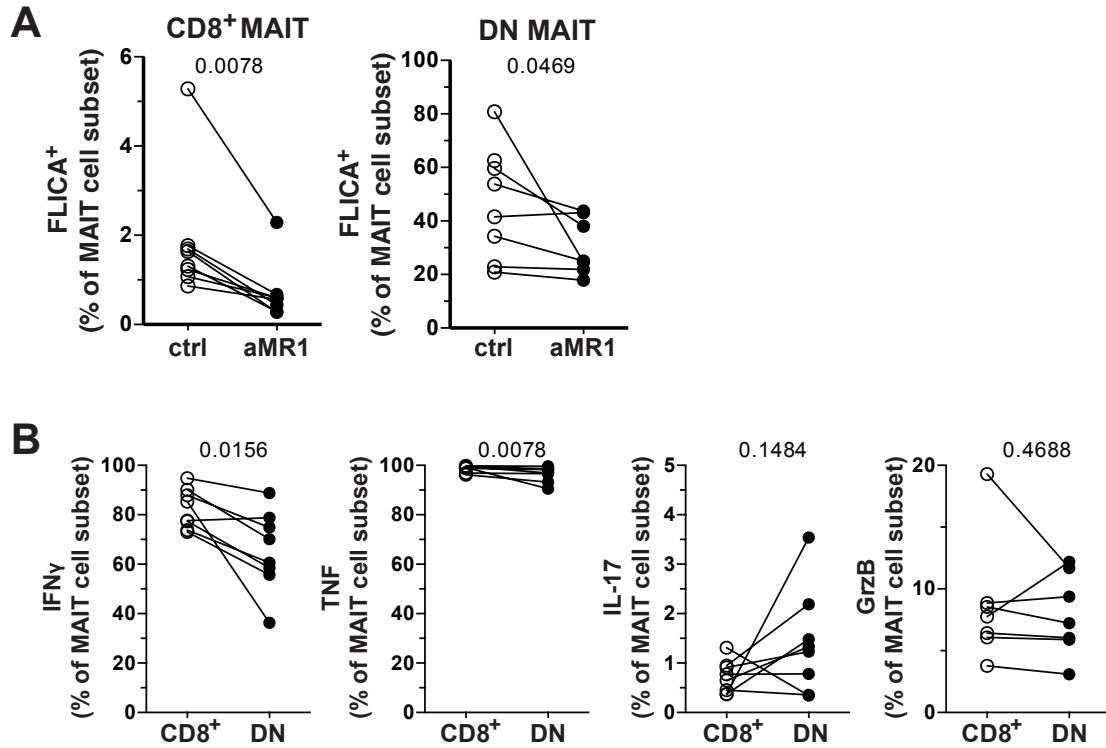

**Fig. S4. MR1-dependency of CD8<sup>+</sup> and DN MAIT cell apoptosis and functionality of non-apoptotic CD8<sup>+</sup> and DN MAIT cells.** (A) Percentage of FLICA<sup>+</sup> FACS-sorted CD8<sup>+</sup> and DN MAIT cells after *E. coli*-stimulation and in the presence of MR1-blocking mAb or isotype ctrl. (B) Percentages of DCM-FLICA<sup>-</sup> FACS-sorted CD8<sup>+</sup> and DN MAIT cells expressing IFN $\gamma$ , TNF, IL-17, and GrzB after 6 h PMA/ionomycin stimulation. Data are from 7 to 8 donors. Lines represent individual donors. The Wilcoxon's signed-rank test was used to detect significant differences between paired samples. aMR1, anti-MR1; ctrl, control.

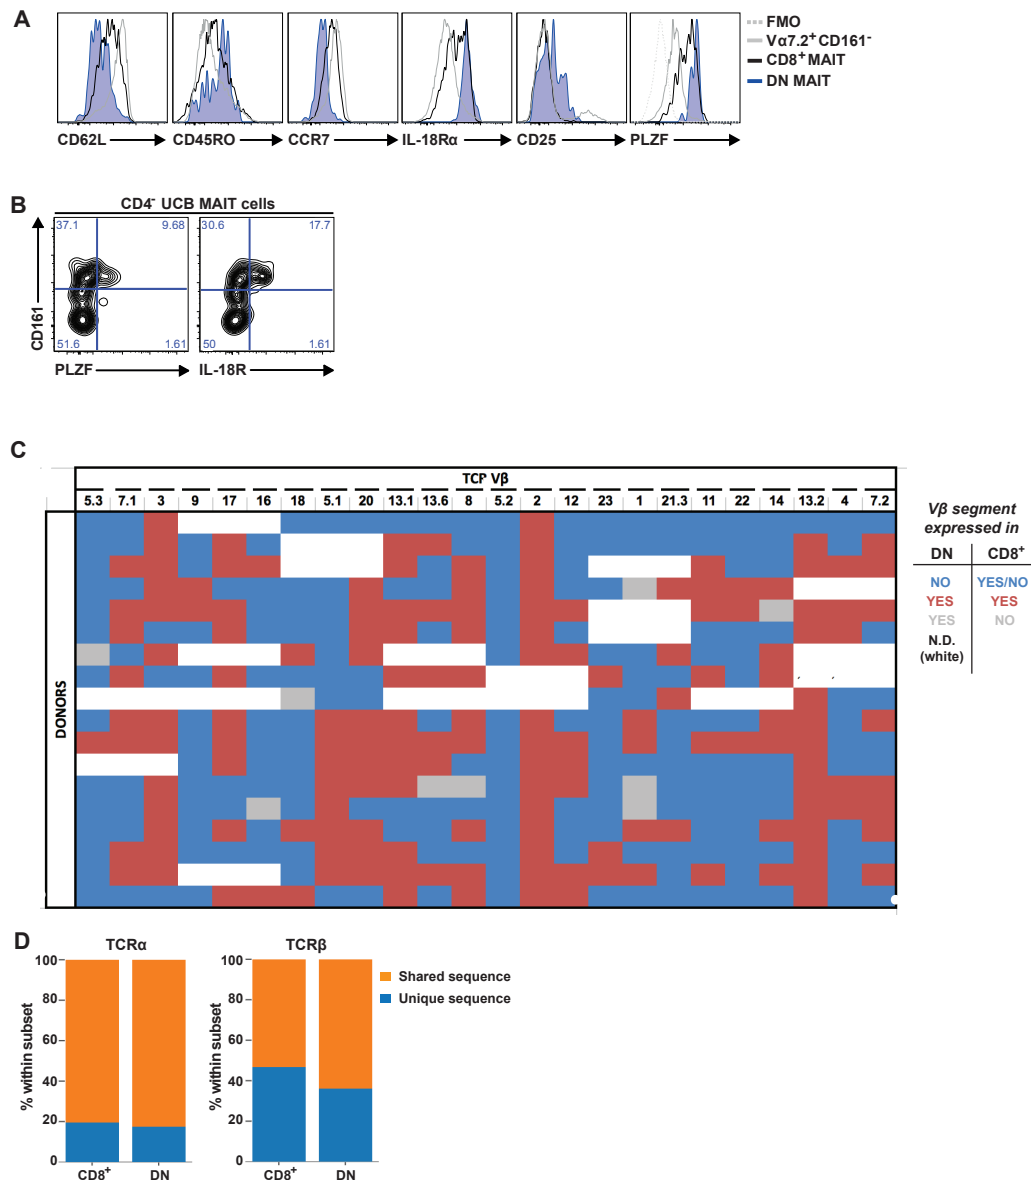

**Fig. S5.** PLZF and IL-18R expression in UCB MAIT cells, and individual TCR Vβ analysis. (A) Representative FACS plots of CD62L, CD45RO, CCR7, IL-18Rα, CD25, and PLZF in fetal splenic CD8<sup>+</sup> and DN MAIT cells. The expression in CD161-Vα7.2<sup>+</sup> cells and the FMO control are also shown. Representative FACS plots from at least 5 donors are shown. (B) Representative FACS staining for CD161, PLZF, and IL-18R expression on umbilical cord blood (UCB) CD4<sup>-</sup> MAIT cells (n=6). (C) Heat map showing the TCR Vβ segments that are not expressed in DN MAIT cells independently of whether they are expressed or not in CD8<sup>+</sup> MAIT cells from the same donor (blue), that are expressed in DN and CD8<sup>+</sup> MAIT cells from the same donor (red), and that are expressed in DN but not in CD8<sup>+</sup> MAIT cells of the same donor (gray). N.D., not determined (blank). Data are from 18 donors. (D) The proportion of shared and unique

TCR $\alpha$  and TCR $\beta$  sequences obtained from the RNAseq analysis of FACS-sorted CD8<sup>+</sup> and DN MAIT cells. The data are an example from 4 donors.



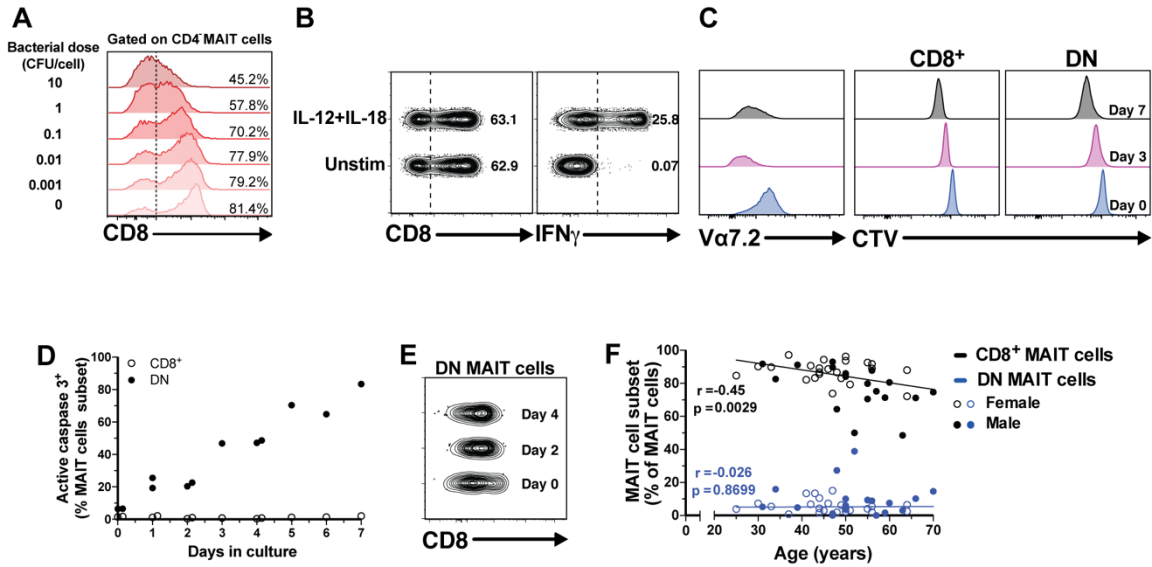

**Fig. S6. CD8 expression on CD8<sup>+</sup> and DN MAIT cells.** (A) Representative example of CD8 downregulation after stimulation of MAIT cells in the mixed PBMC culture with increasing doses of *E. coli*. (B) CD8 expression on MAIT cells following 24 h stimulation with IL-12 and IL-18 (*left*). IFN $\gamma$  production by MAIT cells was used as a positive control for the IL-12 and IL-18 stimulation (*right*). (C) TCR V $\alpha$ 7.2 expression, and CellTrace Violet (CTV) levels on FACS-sorted CD8<sup>+</sup> and DN MAIT cells after 7 days in culture plates that had been pre-coated with V $\alpha$ 7.2 and CD28 mAbs. Representative plots/histograms from 3 individual donors are shown. All data are from 3 independent donors. (D) Percentage of active caspase 3 expression by CD8<sup>+</sup> and DN MAIT cells following stimulation of FACS-sorted CD8<sup>+</sup> MAIT cells with immobilised mAbs against the V $\alpha$ 7.2 TCR and CD28 over time (up to 2 independent donors). (E) CD8 expression on FACS-sorted DN MAIT cells following 4 days in culture plates that had been pre-coated with V $\alpha$ 7.2 and CD28 mAbs (n=3). (F) Correlation between the donor age and the levels of adult peripheral blood CD8<sup>+</sup> and DN MAIT cells as a proportion of T cells (n=42). Correlation was calculated using the Spearman's test.<insert page break here>

**Table S1.** Frequency of CD4<sup>+</sup>CD8<sup>+</sup> and CD4<sup>+</sup>CD8<sup>-</sup> MAIT cells expressing the proteins of the surface immuno-proteome dataset. Values are the average from three donors

| Surface protein   | CD4 <sup>+</sup> CD8 <sup>+</sup> MAIT cells | CD4 <sup>+</sup> CD8 <sup>-</sup> MAIT cells |
|-------------------|----------------------------------------------|----------------------------------------------|
| CD1a              | 0.410                                        | 0.031                                        |
| CD1b              | 0.463                                        | 0.047                                        |
| CD1c              | 0.280                                        | 0.054                                        |
| CD1d              | 0.712                                        | 0.099                                        |
| CD2               | 96.033                                       | 80.433                                       |
| CD5               | 97.500                                       | 98.900                                       |
| CD6               | 99.967                                       | 99.967                                       |
| CD9               | 83.167                                       | 68.800                                       |
| CD10              | 0.485                                        | 0.183                                        |
| CD11a             | 99.867                                       | 99.967                                       |
| CD11b             | 4.707                                        | 3.478                                        |
| CD11b (activated) | 0.751                                        | 0.094                                        |
| CD11c             | 0.863                                        | 0.120                                        |
| CD13              | 0.777                                        | 0.199                                        |
| CD15              | 0.673                                        | 0.074                                        |
| CD18              | 99.967                                       | 99.933                                       |
| CD21              | 0.693                                        | 0.113                                        |
| CD22              | 0.758                                        | 0.023                                        |
| CD23              | 0.388                                        | 0.027                                        |
| CD24              | 0.623                                        | 0.055                                        |
| CD25              | 0.282                                        | 0.000                                        |
| CD26              | 99.867                                       | 99.967                                       |
| CD27              | 81.267                                       | 77.000                                       |
| CD28              | 99.767                                       | 99.800                                       |
| CD29              | 99.967                                       | 99.800                                       |
| CD30              | 0.635                                        | 0.098                                        |
| CD31              | 44.000                                       | 40.387                                       |
| CD32              | 1.405                                        | 0.395                                        |
| CD33              | 1.261                                        | 0.259                                        |
| CD34              | 1.071                                        | 0.266                                        |
| CD35              | 12.867                                       | 8.683                                        |
| CD36              | 2.077                                        | 1.523                                        |
| CD38              | 3.607                                        | 1.967                                        |
| CD39              | 1.665                                        | 0.603                                        |
| CD40              | 0.630                                        | 0.028                                        |
| CD41              | 0.771                                        | 0.416                                        |
| CD42b             | 2.287                                        | 1.329                                        |
| CD43              | 100.000                                      | 99.767                                       |

|                    |         |         |
|--------------------|---------|---------|
| CD44               | 100.000 | 99.967  |
| CD45RA             | 86.967  | 85.167  |
| CD45RB             | 99.967  | 99.967  |
| CD45R0             | 98.767  | 94.867  |
| CD46               | 99.967  | 99.567  |
| CD47               | 100.000 | 100.000 |
| CD48               | 100.000 | 100.000 |
| CD49a              | 1.234   | 0.290   |
| CD49c              | 0.506   | 0.040   |
| CD49d              | 99.500  | 96.867  |
| CD49e*             | 100.000 | 100.000 |
| CD49f*             | 100.000 | 100.000 |
| CD50 (ICAM-3)      | 99.967  | 99.900  |
| CD51               | 1.202   | 0.340   |
| CD51/61            | 1.253   | 0.086   |
| CD52               | 99.867  | 99.933  |
| CD53               | 100.000 | 99.967  |
| CD54*              | 100.000 | 100.000 |
| CD55*              | 100.000 | 100.000 |
| CD57               | 1.297   | 0.657   |
| CD58               | 99.933  | 99.833  |
| CD59*              | 100.000 | 99.967  |
| CD61               | 0.641   | 0.501   |
| CD62E              | 0.911   | 0.269   |
| CD62L              | 7.323   | 2.350   |
| CD62P (P-Selectin) | 1.973   | 0.595   |
| CD63               | 93.200  | 89.567  |
| CD64               | 1.570   | 0.128   |
| CD66a/c/e          | 1.159   | 0.090   |
| CD66b              | 0.718   | 0.029   |
| CD69               | 10.353  | 12.910  |
| CD70               | 3.913   | 3.367   |
| CD71               | 1.106   | 0.168   |
| CD73               | 43.167  | 29.433  |
| CD74               | 1.366   | 0.152   |
| CD79b              | 0.774   | 0.117   |
| CD80               | 1.189   | 0.140   |
| CD81               | 99.900  | 99.833  |
| CD82*              | 100.000 | 100.000 |
| CD83               | 1.316   | 0.274   |
| CD84               | 67.500  | 70.567  |
| CD85a (ILT5)       | 1.746   | 0.982   |
| CD85d (ILT4)       | 0.869   | 0.170   |

|                                         |         |         |
|-----------------------------------------|---------|---------|
| CD85g (ILT7)                            | 1.038   | 0.175   |
| CD85h (ILT1)                            | 1.001   | 0.053   |
| CD85j (ILT2)                            | 1.940   | 0.186   |
| CD85k (ILT3)                            | 1.650   | 0.033   |
| CD86                                    | 0.929   | 0.111   |
| CD87                                    | 0.860   | 0.234   |
| CD88                                    | 0.651   | 0.079   |
| CD89                                    | 0.816   | 0.149   |
| CD90 (Thy1)                             | 9.097   | 4.947   |
| CD93                                    | 0.768   | 0.229   |
| CD94                                    | 19.533  | 11.543  |
| CD95                                    | 93.367  | 90.100  |
| CD96*                                   | 100.000 | 100.000 |
| CD97*                                   | 99.967  | 100.000 |
| CD99                                    | 100.000 | 99.833  |
| CD100*                                  | 99.767  | 99.233  |
| CD101 (BB27)                            | 25.830  | 15.677  |
| CD102*                                  | 100.000 | 99.967  |
| CD103                                   | 2.004   | 1.443   |
| CD104                                   | 0.724   | 0.076   |
| CD105                                   | 0.665   | 0.105   |
| CD106                                   | 0.386   | 0.000   |
| CD107a (LAMP-1)                         | 1.810   | 1.327   |
| CD108                                   | 0.697   | 0.082   |
| CD109                                   | 1.623   | 0.369   |
| CD111                                   | 0.730   | 0.095   |
| CD112 (Nectin-2)                        | 0.982   | 0.434   |
| CD114                                   | 0.692   | 0.095   |
| CD115                                   | 0.785   | 0.273   |
| CD116                                   | 0.848   | 0.200   |
| CD117 (c-kit)                           | 0.851   | 0.222   |
| CD119 (IFN- $\gamma$ R $\alpha$ chain)* | 100.000 | 100.000 |
| CD122                                   | 0.675   | 0.056   |
| CD124                                   | 0.591   | 0.081   |
| CD126 (IL-6R $\alpha$ )*                | 0.133   | 0.050   |
| CD129 (IL-9R)                           | 1.021   | 0.220   |
| CD131                                   | 0.801   | 0.124   |
| CD132*                                  | 100.000 | 99.933  |
| CD134                                   | 0.823   | 0.094   |
| CD135                                   | 0.648   | 0.025   |
| CD137 (4-1BB)                           | 0.807   | 0.057   |
| CD137L (4-1BB L)                        | 0.790   | 0.056   |
| CD138                                   | 0.684   | 0.305   |

|                  |         |         |
|------------------|---------|---------|
| CD140a           | 0.585   | 0.000   |
| CD140b           | 0.760   | 0.190   |
| CD141            | 0.775   | 0.117   |
| CD143            | 0.660   | 0.135   |
| CD144            | 0.799   | 0.067   |
| CD146            | 1.603   | 0.453   |
| CD148            | 2.117   | 1.828   |
| CD150 (SLAM)     | 99.133  | 99.200  |
| CD152            | 0.598   | 0.088   |
| CD154            | 0.674   | 0.053   |
| CD155 (PVR)      | 0.908   | 0.084   |
| CD156c (ADAM-10) | 99.933  | 99.933  |
| CD158a/h         | 0.828   | 0.322   |
| CD158b (NKAT2)   | 0.988   | 0.067   |
| CD158d           | 0.906   | 0.051   |
| CD158e1 (NKB1)   | 0.548   | 0.038   |
| CD158f           | 0.726   | 0.137   |
| CD162            | 99.967  | 100.000 |
| CD163            | 1.123   | 0.352   |
| CD164*           | 100.000 | 100.000 |
| CD165            | 1.215   | 0.930   |
| CD166            | 0.608   | 0.072   |
| CD167a (DDR1)    | 0.782   | 0.075   |
| CD169            | 0.592   | 0.045   |
| CD170 (Siglec-5) | 0.929   | 0.084   |
| CD172a (SIRPa)   | 0.862   | 0.107   |
| CD172b (SIRPb)   | 0.808   | 0.000   |
| CD172g (SIRPg)   | 88.367  | 77.767  |
| CD178 (Fas-L)    | 0.754   | 0.224   |
| CD179a           | 0.801   | 0.175   |
| CD179b           | 0.732   | 0.000   |
| CD180 (RP105)    | 0.798   | 0.164   |
| CD181 (CXCR1)    | 89.100  | 80.367  |
| CD182 (CXCR2)    | 0.789   | 0.232   |
| CD183            | 96.767  | 94.233  |
| CD184 (CXCR4)    | 99.733  | 99.800  |
| CD193 (CCR3)     | 97.467  | 95.800  |
| CD195 (CCR5)     | 99.500  | 99.367  |
| CD196            | 98.733  | 99.233  |
| CD197 (CCR7)     | 1.486   | 1.154   |
| CD200 (OX2)      | 1.038   | 0.381   |
| CD200 R          | 0.949   | 0.250   |
| CD201 (EPCR)     | 0.698   | 0.076   |

|                           |         |         |
|---------------------------|---------|---------|
| CD202b (Tie2/Tek)         | 0.481   | 0.144   |
| CD203c (E-NPP3)           | 0.707   | 0.251   |
| CD205 (DEC-205)           | 0.623   | 0.075   |
| CD206 (MMR)               | 0.689   | 0.027   |
| CD207 (Langerin)          | 0.653   | 0.207   |
| CD209 (DC-SIGN)           | 0.697   | 0.148   |
| CD210 (IL-10R)            | 0.749   | 0.198   |
| CD213a2                   | 0.990   | 0.404   |
| CD215 (IL-15R $\alpha$ )  | 0.895   | 0.564   |
| CD218a (IL-18R $\alpha$ ) | 98.600  | 97.167  |
| CD220                     | 1.301   | 0.720   |
| CD221 (IGF-1R)            | 0.467   | 0.000   |
| CD226 (DNAM-1)            | 73.200  | 69.450  |
| CD229 (Ly-9)*             | 100.000 | 100.000 |
| CD231 (TALLA)             | 1.110   | 0.128   |
| CD235ab                   | 0.750   | 0.248   |
| CD243*                    | 100.000 | 100.000 |
| CD244 (2B4)               | 92.000  | 85.250  |
| CD245 (p220/240)          | 0.861   | 0.259   |
| CD252 (OX40L)             | 0.999   | 0.597   |
| CD253 (Trail)             | 0.895   | 0.229   |
| CD254                     | 1.763   | 1.013   |
| CD255 (TWEAK)             | 0.836   | 0.092   |
| CD257 (BAFF)              | 0.772   | 0.217   |
| CD258 (LIGHT)             | 0.748   | 0.202   |
| CD261 (DR4)               | 0.715   | 0.304   |
| CD262 (DR5)               | 0.553   | 0.120   |
| CD263 (DcR1)              | 3.710   | 2.472   |
| CD266 (Fn14)              | 0.441   | 0.078   |
| CD267 (TACI)              | 0.508   | 0.032   |
| CD268 (BAFF-R)            | 0.437   | 0.106   |
| CD270 (HVEM)*             | 100.000 | 99.800  |
| CD271                     | 0.527   | 0.235   |
| CD273 (B7-DC)             | 0.699   | 0.505   |
| CD274 (B7-H1)             | 99.067  | 96.967  |
| CD275 (B7-H2)             | 0.320   | 0.205   |
| CD276                     | 0.821   | 0.398   |
| CD277*                    | 100.000 | 99.900  |
| CD278 (ICOS)*             | 100.000 | 100.000 |
| CD279 (PD-1)              | 17.590  | 10.423  |
| CD282 (TLR2)              | 0.672   | 0.139   |
| CD284 (TLR4)              | 0.767   | 0.189   |
| CD286 (TLR6)              | 0.811   | 0.000   |

|                       |         |         |
|-----------------------|---------|---------|
| CD290                 | 0.544   | 0.086   |
| CD294                 | 0.521   | 0.115   |
| CD298                 | 99.800  | 99.667  |
| CD300e (IREM-2)       | 0.420   | 0.421   |
| CD300F                | 0.915   | 0.501   |
| CD301                 | 0.770   | 0.537   |
| CD303                 | 0.653   | 0.038   |
| CD304                 | 0.444   | 0.000   |
| CD307                 | 0.503   | 0.073   |
| CD307d (FcRL4)        | 0.660   | 0.024   |
| CD314 (NKG2D)*        | 100.000 | 100.000 |
| CD317*                | 100.000 | 100.000 |
| CD318 (CDCP1)         | 0.616   | 0.173   |
| CD319 (CRACC)         | 91.967  | 85.367  |
| CD324 (E-cadherin)    | 1.599   | 0.410   |
| CD325                 | 0.930   | 0.404   |
| CD326 (Ep-CAM)        | 0.421   | 0.095   |
| CD328 (Siglec-7)      | 33.467  | 27.533  |
| CD334 (FGFR4)         | 0.591   | 0.036   |
| CD335 (NKp46)         | 0.358   | 0.019   |
| CD336 (NKp44)         | 0.405   | 0.031   |
| CD337 (NKp30)         | 0.490   | 0.033   |
| CD338 (ABCG2)         | 0.810   | 0.544   |
| CD340 (erbB2)         | 0.742   | 0.000   |
| CD344 (Frizzled-4)    | 0.913   | 0.380   |
| CD351                 | 0.540   | 0.079   |
| CD352 (NTB-A)         | 99.933  | 99.933  |
| CD354 (TREM-1)        | 0.767   | 0.140   |
| CD355 (CRTAM)         | 0.786   | 0.353   |
| CD357 (GITR)          | 0.889   | 0.587   |
| CD360 (IL-21R)        | 0.965   | 0.173   |
| β2-microglobulin      | 99.900  | 99.733  |
| BTLA*                 | 99.967  | 100.000 |
| C3AR*                 | 100.000 | 100.000 |
| C5L2                  | 1.401   | 0.448   |
| CLEC12A               | 0.756   | 0.145   |
| CLEC9A                | 0.685   | 0.096   |
| CX3CR1*               | 100.000 | 100.000 |
| CXCR7                 | 2.873   | 1.344   |
| delta-Opioid Receptor | 1.319   | 0.220   |
| DLL1                  | 0.620   | 0.159   |
| DLL4                  | 0.580   | 0.039   |
| DR3 (TRAMP)           | 0.738   | 0.220   |

|                               |         |         |
|-------------------------------|---------|---------|
| EGFR                          | 0.641   | 0.021   |
| erbB3/HER-3                   | 0.738   | 0.024   |
| FcRL6                         | 0.873   | 0.095   |
| Galectin-9                    | 0.926   | 0.433   |
| GARP (LRRC32)                 | 1.341   | 0.390   |
| HLA-A,B,C                     | 99.933  | 100.000 |
| HLA-A2                        | 1.082   | 0.189   |
| HLA-DQ                        | 0.564   | 0.115   |
| HLA-DR                        | 0.975   | 0.193   |
| HLA-E*                        | 100.000 | 99.833  |
| HLA-G                         | 0.971   | 0.187   |
| IFN- $\gamma$ R $\beta$ chain | 0.782   | 0.158   |
| Ig light chain k              | 0.918   | 0.047   |
| Ig light chain lambda         | 0.927   | 0.020   |
| IgD                           | 1.044   | 0.433   |
| IgM                           | 1.176   | 0.120   |
| IL-28RA                       | 1.045   | 0.117   |
| Integrin $\alpha 9\beta 1$    | 0.600   | 0.131   |
| Integrin $\beta 5$            | 0.469   | 0.064   |
| Integrin $\beta 7^*$          | 100.000 | 100.000 |
| Jagged 2                      | 0.672   | 0.149   |
| LAP                           | 1.313   | 0.413   |
| LT-beta R                     | 0.981   | 0.402   |
| Mac-2 (Galectin-3)            | 0.592   | 0.182   |
| MAIR-II                       | 0.671   | 0.221   |
| MICA/MICB                     | 0.561   | 0.165   |
| MSC (W3D5)                    | 0.575   | 0.454   |
| MSC (W5C5)                    | 0.663   | 0.372   |
| MSC (W7C6)                    | 0.883   | 0.257   |
| MSC and NPC (W4A5)            | 1.204   | 0.524   |
| MSCA-1 (MSC)                  | 0.243   | 0.033   |
| NKp80                         | 32.433  | 34.533  |
| Notch 1                       | 0.892   | 0.046   |
| Notch 2                       | 0.862   | 0.092   |
| Notch 3                       | 0.522   | 0.000   |
| Notch 4                       | 0.766   | 0.052   |
| NPC (57D2)                    | 0.507   | 0.314   |
| Podoplanin                    | 0.768   | 0.000   |
| Pre-BCR                       | 0.814   | 0.118   |
| PSMA                          | 0.565   | 0.048   |
| Siglec-10                     | 0.714   | 0.212   |
| Siglec-8                      | 0.732   | 0.071   |
| Siglec-9                      | 11.330  | 6.177   |



|                                 |         |         |
|---------------------------------|---------|---------|
| SSEA-1                          | 0.611   | 0.097   |
| SSEA-3                          | 0.542   | 0.000   |
| SSEA-4                          | 0.645   | 0.020   |
| SSEA-5                          | 0.702   | 0.381   |
| TCR $\gamma/\delta$             | 0.747   | 0.152   |
| TCR V $\beta$ 13-2              | 10.513  | 3.993   |
| TCR V $\beta$ 23                | 0.610   | 0.095   |
| TCR V $\beta$ 8                 | 0.568   | 0.299   |
| TCR V $\beta$ 9                 | 1.315   | 0.416   |
| TCR V $\delta$ 2                | 0.174   | 0.034   |
| TCR V $\gamma$ 9                | 0.704   | 0.067   |
| TCR V $\alpha$ 24-J $\alpha$ 18 | 0.835   | 0.035   |
| TCR $\alpha/\beta$              | 99.667  | 99.300  |
| Tim-1                           | 1.125   | 0.232   |
| Tim-3                           | 0.596   | 0.059   |
| Tim-4                           | 0.762   | 0.131   |
| TLT-2                           | 0.924   | 0.558   |
| TRA-1-60-R                      | 0.554   | 0.143   |
| TRA-1-81                        | 0.972   | 0.215   |
| TSLPR (TSLP-R)                  | 0.663   | 0.345   |
| CD7                             | 95.067  | 92.600  |
| CD16                            | 0.357   | 0.062   |
| CD45                            | 100.000 | 100.000 |
| CD56                            | 42.333  | 39.000  |
| CD127*                          | 100.000 | 100.000 |

\* Staining pattern ambiguous for these markers.

**Table S2.** Gene expression analysis determined by Fluidigm Biomark

| Gene Name            | Description                                            | Assay ID      | - Log <sub>10</sub> p-value | Log <sub>2</sub> Fold Change | FDR q-value |
|----------------------|--------------------------------------------------------|---------------|-----------------------------|------------------------------|-------------|
| <b>BCL2</b>          | Bcl-2, apoptosis regulator                             | Hs00608023_m1 | 0.602059991                 | -0.023626767                 | 0.558139535 |
| <b>BCL2A1</b>        | Bcl-2 related protein A1, apoptosis regulator          | Hs00187845_m1 | 0.134082116                 | -0.248145443                 | 0.925324675 |
| <b>BIRC3</b>         | Baculoviral IAP repeat containing 3                    | Hs00985031_g1 | 1.26211193                  | -0.186091381                 | 0.181034483 |
| <b>CASP1</b>         | Caspase 1                                              | Hs00354836_m1 | 0.134082116                 | 0.075364959                  | 0.925324675 |
| <b>CASP3</b>         | Caspase 3                                              | Hs00234387_m1 | 0.24388711                  | -0.001030547                 | 0.842307692 |
| <b>CCL3</b>          | MIP-1a, C-C motif chemokine ligand 3                   | Hs00234142_m1 | 0.204119983                 | -1.481561099                 | 0.882042254 |
| <b>CCL4</b>          | MIP-1b, C-C motif chemokine ligand 4                   | Hs99999148_m1 | 0.086020671                 | 0.841855521                  | 0.972222222 |
| <b>CCL5</b>          | RANTES, C-C motif chemokine ligand 5                   | Hs00174575_m1 | 2.10720997                  | 0.429663658                  | 0.046875    |
| <b>CCNA2</b>         | Cyclin A2                                              | Hs00996788_m1 | 0                           | 0.068297006                  | 1           |
| <b>CCND2</b>         | Cyclin D2                                              | Hs00153380_m1 | 0                           | -0.0203602                   | 1           |
| <b>CCR1</b>          | CD191, C-C motif chemokine receptor 1                  | Hs00928897_s1 | 0.24388711                  | -0.218479003                 | 0.842307692 |
| <b>CCR6</b>          | CD196, C-C motif chemokine receptor 6                  | Hs01890706_s1 | 0.040884044                 | -0.20127442                  | 1           |
| <b>CCR7</b>          | CD197, C-C motif chemokine receptor 7                  | Hs01013469_m1 | 1.26211193                  | -0.75356261                  | 0.181034483 |
| <b>CD16A</b>         | CD16b, Fc fragment of IgG receptor IIIb                | Hs00275547_m1 | 0.204119983                 | -0.023168682                 | 0.882042254 |
| <b>CD160</b>         | CD160 molecule                                         | Hs00199894_m1 | 1.129486364                 | 0.848337448                  | 0.2375      |
| <b>CD161.KLR B1</b>  | Killer cell lectin like receptor B1                    | Hs00174469_m1 | 0.304436244                 | 0.312935924                  | 0.786885246 |
| <b>CD226</b>         | CD226 molecule, DNAM-1                                 | Hs00170832_m1 | 0.692236622                 | -0.384724059                 | 0.475609756 |
| <b>CD244</b>         | CD244 molecule, 2B4                                    | Hs00900271_m1 | 0.370813467                 | 0.850072728                  | 0.743181818 |
| <b>CD274</b>         | CD274 molecule, PDL1                                   | Hs01125301_m1 | 0                           | -0.359775013                 | 1           |
| <b>CD3</b>           | CD3d molecule                                          | Hs00174158_m1 | 0.52174924                  | -0.02851531                  | 0.627717391 |
| <b>CD38</b>          | CD38 molecule                                          | Hs01120071_m1 | 0                           | -0.968282729                 | 1           |
| <b>CD4</b>           | CD4 molecule                                           | Hs01058407_m1 | 0.903089987                 | -4.748462272                 | 0.342857143 |
| <b>CD69</b>          | CD69 molecule, CLEC2C                                  | Hs00934033_m1 | 0.24388711                  | -0.063442225                 | 0.842307692 |
| <b>CD8</b>           | CD8a molecule, Leu2                                    | Hs00233520_m1 | 2.408239965                 | 2.697664787                  | 0.026785714 |
| <b>CDK6</b>          | Cyclin dependent kinase 6                              | Hs01026371_m1 | 0.304436244                 | 0.223045018                  | 0.786885246 |
| <b>CRTAM (CD355)</b> | Cytotoxic and regulatory T-cell molecule               | Hs00219699_m1 | 1.010299957                 | 1.096006519                  | 0.275735294 |
| <b>ENTPD1</b>        | Ectonucleoside triphosphate Diphosphohydrolase 1, CD39 | Hs00969559_m1 | 0                           | -1.44560206                  | 1           |
| <b>EOMES</b>         | Eomesodermin                                           | Hs00172872_m1 | 0.889726025                 | 0.897555536                  | 0.34375     |
| <b>FAS</b>           | Fas cell surface death receptor, CD95                  | Hs00531110_m1 | 1.709269961                 | -0.335296512                 | 0.098684211 |
| <b>FASLG</b>         | Fas ligand, CD178                                      | Hs00181225_m1 | 0.129486364                 | -0.05477507                  | 0.925324675 |
| <b>GAPDH</b>         | Glyceraldehyde-3-phosphate dehydrogenase               | Hs99999905_m1 | 0.040884044                 | 0.036930866                  | 1           |
| <b>GNLY</b>          | Granulysin, LAG-2                                      | Hs00246266_m1 | 0.304436244                 | 0.084745999                  | 0.786885246 |
| <b>GZMA</b>          | Granzyme A, CTLA3                                      | Hs00989184_m1 | 1.26211193                  | 0.403346859                  | 0.181034483 |
| <b>GZMB</b>          | Granzyme B, CTLA1                                      | Hs00188051_m1 | 0.301029996                 | 4.998777502                  | 0.786885246 |
| <b>GZMK</b>          | Granzyme K, TRYP2                                      | Hs00157878_m1 | 1.563141925                 | 0.30654727                   | 0.114130435 |
| <b>HLADRA</b>        | Major histocompatibility complex, class II, DR alpha   | Hs00219578_m1 | 1.010299957                 | -1.83575486                  | 0.275735294 |
| <b>ICOS</b>          | Inducible T-cell costimulator, CD278                   | Hs00359999_m1 | 0.370813467                 | -0.311366657                 | 0.743181818 |
| <b>IFNG</b>          | Interferon gamma                                       | Hs00989291_m1 | 0.336357958                 | 2.060832829                  | 0.786885246 |
| <b>IFI16</b>         | Interferon gamma inducible protein 16                  | Hs00194261_m1 | 0.444452138                 | -0.05553129                  | 0.704081633 |
| <b>IGF2R</b>         | Insulin like growth factor 2 receptor, CD222           | Hs00974474_m1 | 0.185523494                 | 0.111193734                  | 0.882042254 |
| <b>IKZF1</b>         | IKAROS family zinc finger 1                            | Hs00958474_m1 | 0.444452138                 | 0.027089644                  | 0.704081633 |
| <b>IKZF2</b>         | IKAROS family zinc finger 2, HELIOS                    | Hs00212361_m1 | 0.784990675                 | 0.46218061                   | 0.403846154 |
| <b>IL12RB1</b>       | Interleukin 12 receptor subunit beta 1, CD212          | Hs00538167_m1 | 0.086020671                 | -0.440078514                 | 0.972222222 |
| <b>IL12RB2</b>       | Interleukin 12 receptor subunit beta 2                 | Hs01548202_m1 | 1.806179974                 | 0.177127139                  | 0.088235294 |
| <b>IL18R1</b>        | Interleukin 18 receptor 1, IL18RA                      | Hs00977691_m1 | 0.370813467                 | -0.101777681                 | 0.743181818 |
| <b>IL18RAP</b>       | Interleukin 18 receptor accessory protein, IL-18Rbeta  | Hs00977695_m1 | 1.26211193                  | 0.967475377                  | 0.181034483 |
| <b>IL21R</b>         | Interleukin 21 receptor, CD360                         | Hs00222310_m1 | 1.010299957                 | 0.41740512                   | 0.275735294 |
| <b>IL2RA (CD25)</b>  | Interleukin 2 receptor subunit alpha                   | Hs00907778_m1 | 0                           | -1.956521878                 | 1           |
| <b>IL2RG</b>         | Interleukin 2 receptor subunit gamma, CD132            | Hs00953624_m1 | 0.040884044                 | -0.04312786                  | 1           |
| <b>IL7R</b>          | Interleukin 7 receptor, CD127                          | Hs00902334_m1 | 0.086020671                 | 0.01681744                   | 0.972222222 |
| <b>IRF4</b>          | Interferon regulatory factor 4                         | Hs01056533_m1 | 0                           | -1.215190249                 | 1           |

|                             |                                                                                                      |               |             |              |             |
|-----------------------------|------------------------------------------------------------------------------------------------------|---------------|-------------|--------------|-------------|
| <b>IRF7</b>                 | Interferon regulatory factor 7                                                                       | Hs01014809_g1 | 0.134082116 | 0.380800315  | 0.925324675 |
| <b>KIR3DL1, KIR3DS1</b>     | Killer cell immunoglobulin like receptor, three Ig domains and long cytoplasmic tail 1               | Hs00744448_s1 | 1.408239965 | -0.841851849 | 0.15625     |
| <b>KLF10</b>                | Kruppel like factor 10                                                                               | Hs00921811_m1 | 0.040884044 | 0.018617069  | 1           |
| <b>KLRC1</b>                | Killer cell lectin like receptor C1, NKG2A                                                           | Hs00970273_g1 | 1.26211193  | 1.31019038   | 0.181034483 |
| <b>KLRC2, KLRC3</b>         | Killer cell lectin like receptor C2, NKG2C                                                           | Hs04192492_gH | 0           | -1.888357108 | 1           |
| <b>KLRD1</b>                | Killer cell lectin like receptor D1, CD94                                                            | Hs00233844_m1 | 2.10720997  | 0.711815903  | 0.046875    |
| <b>KLRF1</b>                | Killer cell lectin like receptor F1                                                                  | Hs00212979_m1 | 0.134082116 | 0.55688785   | 0.925324675 |
| <b>KLRG1</b>                | Killer cell lectin like receptor G1                                                                  | Hs00929964_m1 | 0.370813467 | 0.266707715  | 0.743181818 |
| <b>KLRK1, KLR C4, KLRK1</b> | Killer cell lectin like receptor K1, NKG2D                                                           | Hs00183683_m1 | 2.408239965 | 0.493858571  | 0.026785714 |
| <b>LAIR1</b>                | Leukocyte associated immunoglobulin like receptor 1, CD305                                           | Hs00253790_m1 | 0.425968732 | -0.352001914 | 0.72        |
| <b>LAMP1 (CD107a)</b>       | Lysosomal associated membrane protein 1                                                              | Hs00174766_m1 | 0.602059991 | -0.17560898  | 0.558139535 |
| <b>MAP3K8</b>               | Mitogen-activated protein kinase kinase kinase 8                                                     | Hs00178297_m1 | 0.040884044 | -0.11211791  | 1           |
| <b>MIR155, MIR155HG</b>     | MIR155 host gene                                                                                     | Hs01374569_m1 | 0.329058719 | -1.226696612 | 0.786885246 |
| <b>MTHFD2</b>               | Methylenetetrahydrofolate dehydrogenase (NADP+ dependent) 2, methenyltetrahydrofolate cyclohydrolase | Hs00759197_s1 | 2.408239965 | -0.435292714 | 0.026785714 |
| <b>NCAM (CD56)</b>          | Neural cell adhesion molecule 1                                                                      | Hs00941830_m1 | 0.370813467 | 0.394010313  | 0.743181818 |
| <b>NCR1</b>                 | Natural cytotoxicity triggering receptor 1, CD335                                                    | Hs00183118_m1 | 0.204119983 | -1.352297494 | 0.882042254 |
| <b>NCR3</b>                 | Natural cytotoxicity triggering receptor 3, CD337                                                    | Hs00394809_m1 | 1.010299957 | 0.148483517  | 0.275735294 |
| <b>NFKB1</b>                | Nuclear factor kappa B subunit 1, NF-kB1                                                             | Hs00765730_m1 | 0.086020671 | -0.08315448  | 0.972222222 |
| <b>NFKBIA</b>               | NFKB inhibitor alpha                                                                                 | Hs00355671_g1 | 0.52174924  | 0.216397771  | 0.627717391 |
| <b>NFKBID</b>               | NFKB inhibitor delta                                                                                 | Hs01076336_m1 | 0.185523494 | 0.075867561  | 0.882042254 |
| <b>NKG7</b>                 | Natural killer cell granule protein 7                                                                | Hs01120688_g1 | 1.709269961 | 0.444677702  | 0.098684211 |
| <b>PDCD1</b>                | Programmed cell death 1, PD-1, CD279                                                                 | Hs01550088_m1 | 0.073786214 | 0.037546225  | 0.987804878 |
| <b>ZBTB16 (PLZF)</b>        | Zinc finger and BTB domain containing 16                                                             | Hs00957433_m1 | 0.52174924  | 0.115355429  | 0.627717391 |
| <b>SERPINB9</b>             | Serpin family B member 9                                                                             | Hs00394497_m1 | 0.24388711  | 0.129690935  | 0.842307692 |
| <b>SLAMF5</b>               | CD84 molecule                                                                                        | Hs01547121_m1 | 0.185523494 | 0.277539808  | 0.882042254 |
| <b>SLAMF7</b>               | SLAM family member 7, CD319                                                                          | Hs00900280_m1 | 1.563141925 | 0.469132473  | 0.114130435 |
| <b>STX11</b>                | Syntaxin 11                                                                                          | Hs01891623_s1 | 0.692236622 | -0.171519622 | 0.475609756 |
| <b>TBX21</b>                | T-box 21, T-bet                                                                                      | Hs00203436_m1 | 0.444452138 | 0.06473791   | 0.704081633 |
| <b>TESPA1</b>               | Thymocyte expressed, positive selection associated 1                                                 | Hs00207702_m1 | 1.563141925 | -0.564904512 | 0.114130435 |
| <b>TGFBR1</b>               | Transforming growth factor beta receptor 1                                                           | Hs00610318_m1 | 0.134082116 | 0.128596868  | 0.925324675 |
| <b>TIGIT</b>                | T-cell immunoreceptor with Ig and ITIM domains                                                       | Hs00545087_m1 | 0.784990675 | -1.367715848 | 0.403846154 |
| <b>TNF</b>                  | Tumor necrosis factor, TNF-alpha                                                                     | Hs01113624_g1 | 0.784990675 | -0.100012861 | 0.403846154 |
| <b>TNFRSF9</b>              | TNF receptor superfamily member 9, CD137                                                             | Hs00155512_m1 | 0           | -0.34392676  | 1           |
| <b>TNFRSF10</b>             | Tumor necrosis factor superfamily member 10, TRAIL                                                   | Hs00921974_m1 | 1.563141925 | -0.310541877 | 0.114130435 |

**Table S3.** Gene expression analysis determined by RNA-seq

| Gene name                                 | logFC       | AveExpr     | t           | P.Value     | B           |
|-------------------------------------------|-------------|-------------|-------------|-------------|-------------|
| <b>Genes upregulated in DN MAIT cells</b> |             |             |             |             |             |
| ZNF536                                    | 4.373452875 | -1.50887295 | 15.26899811 | 2.54E-07    | 3.794794638 |
| RRM2                                      | 6.476059532 | 0.807202866 | 11.23889548 | 2.84E-06    | 2.973000439 |
| ESR1                                      | 4.600578185 | 1.040832527 | 9.287939032 | 1.23E-05    | 2.303301355 |
| NBEAP1                                    | 4.366224237 | -1.59843468 | 8.640337813 | 2.11E-05    | 2.018902096 |
| RP3-331H24.6                              | 4.901041333 | -1.32856425 | -8.36972801 | 2.68E-05    | 1.888760118 |
| PIH1D2                                    | 4.689102645 | 0.600133787 | 7.707031223 | 4.93E-05    | 1.538397082 |
| AC098973.1                                | 4.793037854 | 1.500276345 | 7.131759137 | 8.65E-05    | 1.193505044 |
| SLITRK4                                   | 4.310239578 | 1.643311563 | 7.026163456 | 9.62E-05    | 1.125670154 |
| RP4-539M6.22                              | 5.834530925 | 1.66242543  | 5.948642679 | 0.000308271 | 0.342867221 |
| SCUBE1                                    | 4.700267565 | 1.434277838 | 6.217516369 | 0.000227564 | 0.554591378 |
| TCL6                                      | 4.562751641 | 1.518362113 | -6.01432497 | 0.000285998 | 0.395658716 |
| MASP2                                     | 4.069433258 | 1.253279571 | 5.972721448 | 0.000299892 | 0.362301761 |
| SUSD1                                     | 4.421749095 | 0.661408831 | 5.622778845 | 0.000450928 | 0.070377296 |
| MYEOV                                     | 4.866015891 | 0.354733313 | 4.996174562 | 0.000975636 | -0.50567707 |
| WNT10A                                    | 4.300553423 | 1.137646235 | 4.901207022 | 0.001102011 | 0.599232634 |
| ESAM                                      | 4.396670279 | 1.612871596 | 4.845877787 | 0.001183765 | -0.65451707 |
| CBFA2T3                                   | 4.789103101 | 1.018881751 | 4.475139271 | 0.001934296 | 1.039883208 |
| PDGFA                                     | 4.482589136 | 0.23274816  | 4.512557621 | 0.001839084 | 0.999803943 |
| RASD2                                     | 4.718285713 | 0.029968889 | 4.210523367 | 0.002780363 | 1.330912354 |
| OSM                                       | 4.305702167 | 0.11741218  | 4.150697383 | 0.003022365 | 1.398545994 |
| IRF8                                      | 5.665055754 | 2.546695428 | 3.763732284 | 0.005250655 | 1.851987282 |
| LRAT                                      | 4.089590001 | 1.259826928 | 3.664799194 | 0.00606751  | 1.972213943 |
| NR4A3                                     | 4.119295116 | 1.771073696 | 3.572147673 | 0.00695573  | 2.086314484 |
| NLN                                       | 4.417123321 | 1.554366073 | 3.347285598 | 0.009735349 | 2.368964201 |

|                                             |             |             |             |             |             |
|---------------------------------------------|-------------|-------------|-------------|-------------|-------------|
| <b>HSPA6</b>                                | 5.435601767 | 1.034849953 | 2.570399838 | 0.032394375 | 3.392664347 |
| <b>Genes upregulated in CD8+ MAIT cells</b> |             |             |             |             |             |
| <b>MB21D2</b>                               | 4.626181301 | 0.879301368 | 16.14872846 | 1.63E-07    | 3.91269017  |
| <b>CD8B</b>                                 | 7.97416245  | 2.431660886 | 8.577817244 | 2.23E-05    | 1.989458209 |
| <b>CD8A</b>                                 | 4.320835812 | 6.919509211 | 10.61813472 | 4.41E-06    | 2.786092659 |
| <b>ZNF436-AS1</b>                           | 4.551666634 | -0.79127475 | 9.924899132 | 7.40E-06    | 2.549894459 |
| <b>FAM167A</b>                              | 4.552117592 | 1.342103967 | 9.577242721 | 9.72E-06    | 2.419092864 |
| <b>MZB1</b>                                 | 4.708108775 | 1.335105865 | 8.816261008 | 1.82E-05    | 2.099808202 |
| <b>CTD-2270P14.5</b>                        | 4.073707527 | 1.105158538 | 7.37323442  | 6.80E-05    | 1.343227655 |
| <b>SDCBP2</b>                               | 4.426527991 | 1.025346485 | 7.1571148   | 8.43E-05    | 1.209576328 |
| <b>SLC44A3</b>                              | 4.286174461 | 1.420332694 | 7.030094798 | 9.58E-05    | 1.128222039 |
| <b>C3orf18</b>                              | 4.575961735 | 0.531778496 | 6.857084136 | 0.000114486 | 1.013950662 |
| <b>TMC3-AS1</b>                             | 4.008901226 | -1.60943888 | 6.121473584 | 0.000253362 | 0.48028521  |
| <b>BHLHB9</b>                               | 4.836152516 | 1.840296269 | 5.759118441 | 0.000383939 | 0.186558055 |
| <b>ACTG1P1</b>                              | 4.175736878 | 1.094960824 | 5.588572748 | 0.000469677 | 0.040729078 |
| <b>RP11-77P6.2</b>                          | 4.121861942 | 0.514509226 | 5.491023781 | 0.000527995 | 0.044937456 |
| <b>CCDC168</b>                              | 4.04451627  | 0.452445264 | 4.973497115 | 0.001004311 | -0.52786452 |
| <b>LINC01422</b>                            | 4.831042053 | 0.378596777 | 4.388191971 | 0.002176739 | 1.134042632 |
| <b>TKTL1</b>                                | 4.159719648 | 1.032085592 | 4.168855933 | 0.002946603 | 1.377946539 |
| <b>TSPY26P</b>                              | 4.105405213 | 0.062568043 | 3.713143623 | 0.005652641 | 1.913253281 |
| <b>ZNF837</b>                               | 4.489382775 | 0.17814574  | 3.657925376 | 0.006129078 | 1.980629597 |
| <b>ARSJ</b>                                 | 4.054115349 | 0.463441538 | 3.269045491 | 0.010959429 | 2.469087208 |
| <b>EHD3</b>                                 | 4.182122054 | 0.333304573 | 3.037223883 | 0.015628831 | 2.770467286 |

**Table S4.** Flow cytometry antibodies used in the study

| <b>Antibody name</b>                            | <b>Clone</b>   | <b>Antibody source</b> |
|-------------------------------------------------|----------------|------------------------|
| anti-active Caspase 3 Brilliant Violet (BV) 650 | C92-605        | <b>BD Biosciences</b>  |
| anti-CD3 FITC, Alexa Fluor (AF) 700, APC, BV510 | UCHT1          |                        |
| anti-CD4 APC-H7                                 | SK3            |                        |
| anti-CD4 APC-H7, V500                           | RPA-T4         |                        |
| anti-CD8 PE                                     | RPA-T8         |                        |
| anti-CD8 PerCP-Cy5.5                            | SK1            |                        |
| anti-CD14 AF700                                 | M5E2           |                        |
| anti-CD19 FITC, AF700                           | HIB19          |                        |
| anti-CD25 PECy7                                 | M-A251         |                        |
| anti-CD62L V450                                 | DREG-56        |                        |
| anti-CD161 PECy5, FITC                          | DX12           |                        |
| anti-GrzB AF700                                 | GB11           |                        |
| anti-TNF PECy7                                  | MAb11          |                        |
| anti-ROR $\gamma$ t PE                          | Q21-559        |                        |
| anti-Bax AF488                                  | 2D2            | <b>BioLegend</b>       |
| anti-Bcl-2 PE                                   | 100            |                        |
| anti-CD2 FITC                                   | RPA-2.10       |                        |
| anti-CD3 BV650, BV785                           | OKT3           |                        |
| anti-CD4 BV510, BV711                           | OKT4           |                        |
| anti-CD8 PE, APC, BV570                         | RPA-T8         |                        |
| anti-CD9 PE                                     | HI9a           |                        |
| anti-CD20 FITC                                  | 2H7            |                        |
| anti-CD27 BV711                                 | O323           |                        |
| anti-CD45 AF700                                 | HI30           |                        |
| anti-CD45RO PECy7                               | UCHL1          |                        |
| anti-CD94 FITC                                  | DX22           |                        |
| anti-CD95 FITC                                  | DX2            |                        |
| anti-CD101 APC                                  | BB27           |                        |
| anti-CD123 FITC                                 | 6H6            |                        |
| anti-CD127 BV650                                | A019D5         |                        |
| anti-CD161 BV605                                | HP-3G10        |                        |
| anti-CCR7 BV421                                 | G043H7         |                        |
| anti-Fc $\epsilon$ RI $\alpha$ FITC             | AER-37 (CRA-1) |                        |
| anti-Gnly PE                                    | DH2            |                        |
| anti-GrzA AF700                                 | CB9            |                        |
| anti-GrzB B FITC                                | GB11           |                        |
| anti-IFN $\gamma$ BV785                         | 4S.B3          |                        |

|                                                                                                                                                                                                                                                                                              |                                                           |                                                                           |
|----------------------------------------------------------------------------------------------------------------------------------------------------------------------------------------------------------------------------------------------------------------------------------------------|-----------------------------------------------------------|---------------------------------------------------------------------------|
| anti-IL-17 BV711<br>anti-IL-18R $\alpha$ (CD218) PE<br>anti-NKG2D (CD314) BV421<br>anti-PD-1 BV421<br>anti-Prf BV421<br>anti-T-bet BV711<br>anti-V $\alpha$ 7.2 PE, APC, PECy7, and FITC<br>LEGENDScreen™ Lyophilized Antibody<br>Panel, Human Cell Screening (PE) Kit<br>streptavidin BV421 | BL168<br>H44<br>1D11<br>EH12.2H7<br>B-D48<br>4B10<br>3C10 |                                                                           |
| anti-Eomes FITC<br>anti-Helios eFluor 450                                                                                                                                                                                                                                                    | WD1928<br>22F6                                            | <b>eBioscience</b>                                                        |
| anti-IL-18R $\alpha$ PE<br>anti-PLZF APC                                                                                                                                                                                                                                                     | 70625<br>6318100                                          | <b>R&amp;D Systems</b>                                                    |
| anti-CD3 PE-Texas Red<br>anti-CD56 PE-Texas Red<br>anti-NKG2A PE<br>V $\beta$ repertoire kit (IOtest® Beta Mark<br>TCR Vbeta Repertoire Kit)                                                                                                                                                 | UCHT1<br>N901 (NKH-1)<br>Z199                             | <b>Beckman Coulter</b>                                                    |
| anti-CD3 PE-Texas Red<br>anti-CD8 Qdot 605<br>LIVE/DEAD® Fixable Aqua, Green, and<br>Near-IR Dead Cell Stain Kits                                                                                                                                                                            | S4.1<br>3B5                                               | <b>Invitrogen / Life<br/>Technologies /<br/>Thermo Fisher</b>             |
| anti-BDCA-2 FITC<br>anti-SLAN (M-DC8) FITC                                                                                                                                                                                                                                                   | AC144<br>DD1                                              | <b>Miltenyi Biotec</b>                                                    |
| anti-CD14 FITC                                                                                                                                                                                                                                                                               | TÜK4                                                      | <b>Dako</b>                                                               |
| anti- $\alpha$ 4 $\beta$ 7 integrin*                                                                                                                                                                                                                                                         | Act-1                                                     | <b>The AIDS Reagent<br/>Program, Division<br/>of AIDS, NIAID,<br/>NIH</b> |
| Human MR1 5-OP-RU PE, BV421<br>Human MR1 6-FP PE, AF680                                                                                                                                                                                                                                      | MR1 tetramers                                             | <b>The NIH Tetramer<br/>Core Facility at<br/>Emory University</b>         |

\* The anti- $\alpha$ 4 $\beta$ 7 integrin antibody was biotinylated as per the manufacturer's instructions (FluoReporter® Mini-Biotin-XX Protein Labeling Kit, Life Technologies).
